# Supplementary material
Source: PubMed Central journal article supplement (PMC9274296)
Supplement: NIHMS1808467-supplement-supple_table_1.pdf [file NIHMS1808467-supplement-supple_table_1.pdf]

**Supplemental 1. Bivariable and Multivariable Survival Analysis for Patients with pT4b Locally Advanced Gastric Cancer who Underwent Gastrectomy with Multivisceral Resection**

|                         | <b>Bivariable HR (95% CI)*</b> | <b>Multivariable HR (95% CI)*</b> |
|-------------------------|--------------------------------|-----------------------------------|
| Age (years)             |                                |                                   |
| 18-49                   | Reference                      | Reference                         |
| 50-64                   | 0.94 (0.63-1.39)               | 1.00 (0.66-1.53)                  |
| 65-74                   | 0.92 (0.60-1.42)               | 1.14 (0.72-1.81)                  |
| ≥ 75                    | 1.48 (0.97-2.26)               | 1.44 (0.91-2.28)                  |
| Female Sex              | 1.31 (1.01-1.69)               | 1.29 (0.97-1.71)                  |
| Race                    |                                |                                   |
| White                   | Reference                      |                                   |
| African-American        | 0.82 (0.60-1.14)               |                                   |
| Asian-American          | 0.67 (0.41-1.11)               |                                   |
| Hispanic Ethnicity      |                                |                                   |
| Yes                     | 1.04 (0.68-1.60)               |                                   |
| Charlson-Deyo Score     |                                |                                   |
| 0                       | Reference                      | Reference                         |
| 1                       | 1.28 (0.95-1.73)               | 1.19 (0.86-1.64)                  |
| ≥ 2                     | 0.91 (0.54-1.51)               | 0.90 (0.51-1.58)                  |
| Gastrectomy Type        |                                |                                   |
| Subtotal                | Reference                      |                                   |
| Total                   | 1.35 (1.03-1.79)               | 1.16 (0.86-1.56)                  |
| Gastrectomy Unspecified | 1.48 (1.00-2.17)               | 1.20 (0.80-1.81)                  |

|                                   |                  |                  |
|-----------------------------------|------------------|------------------|
| Pathologic Nodal Stage            |                  |                  |
| 0                                 | Reference        | Reference        |
| 1                                 | 1.51 (0.98-2.35) | 1.54 (0.98-2.42) |
| 2                                 | 1.35 (0.88-2.08) | 1.38 (0.88-2.16) |
| 3                                 | 2.07 (1.43-2.98) | 1.97 (1.33-2.91) |
| Resection Margin Status           |                  |                  |
| Positive                          | 1.87 (1.44-2.43) | 1.49 (1.11-2.00) |
| Neoadjuvant Chemotherapy          |                  |                  |
| Yes                               | 0.93 (0.70-1.25) |                  |
| Neoadjuvant Radiation             |                  |                  |
| Yes                               | 0.84 (0.31-2.26) |                  |
| Adjuvant Chemotherapy             |                  |                  |
| Yes                               | 0.53 (0.41-0.69) | 0.58 (0.42-0.80) |
| Adjuvant Radiation Therapy        |                  |                  |
| Yes                               | 0.60 (0.44-0.82) | 0.84 (0.58-1.21) |
| Treatment at a High-Volume Center |                  |                  |
| Yes                               | 0.76 (0.57-0.99) | 0.72 (0.54-0.96) |

\* Hazard ratios and 95% confidence intervals
