# Supplementary material
Source: PubMed Central journal article supplement (PMC9274296)

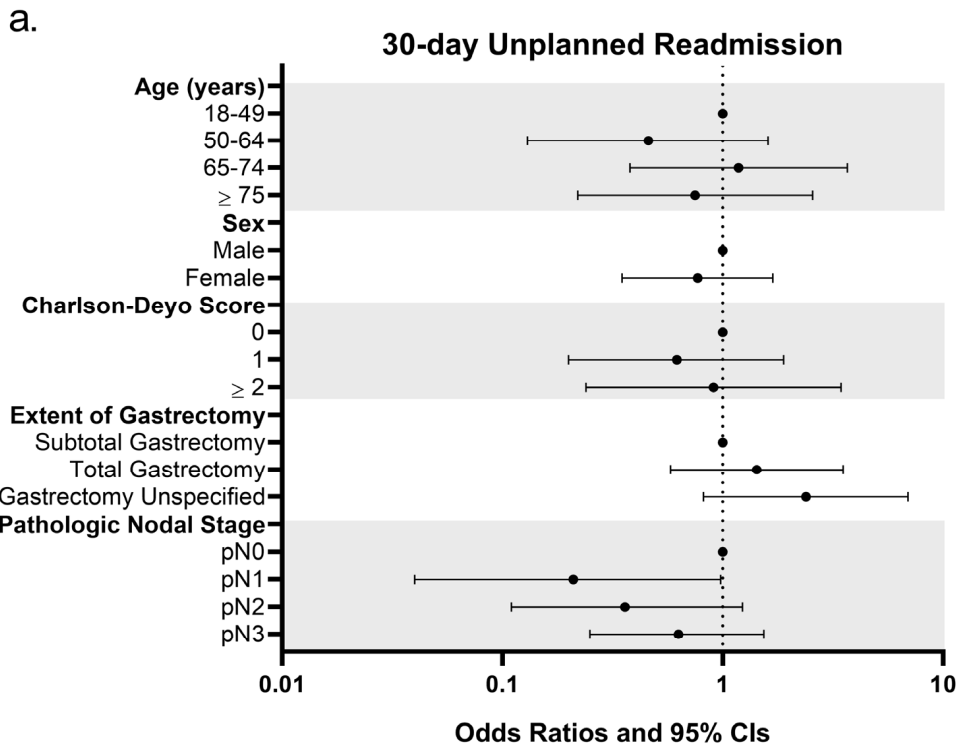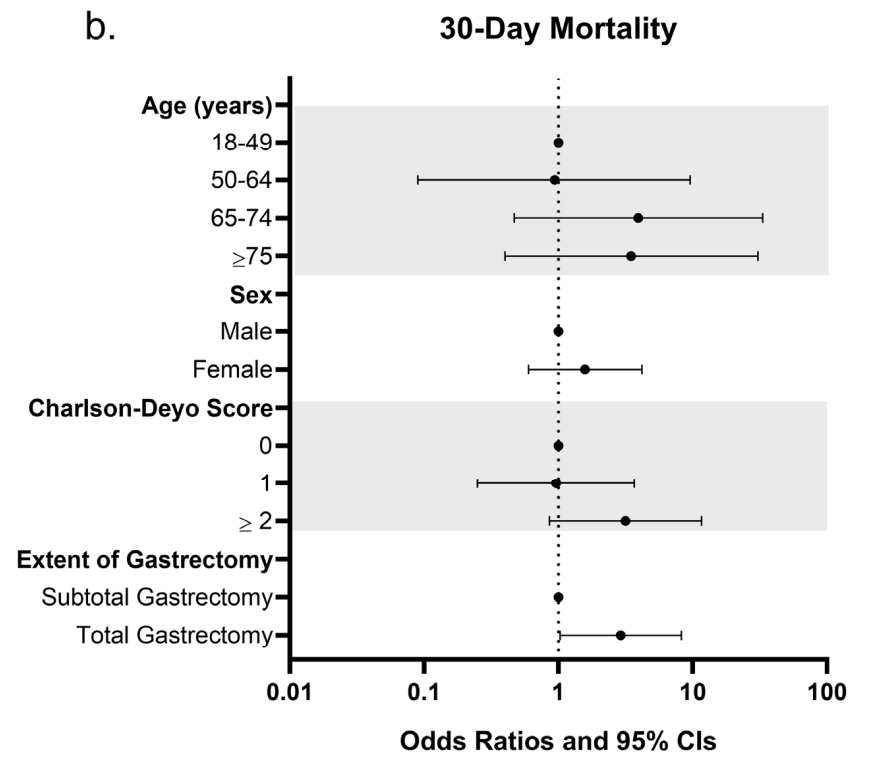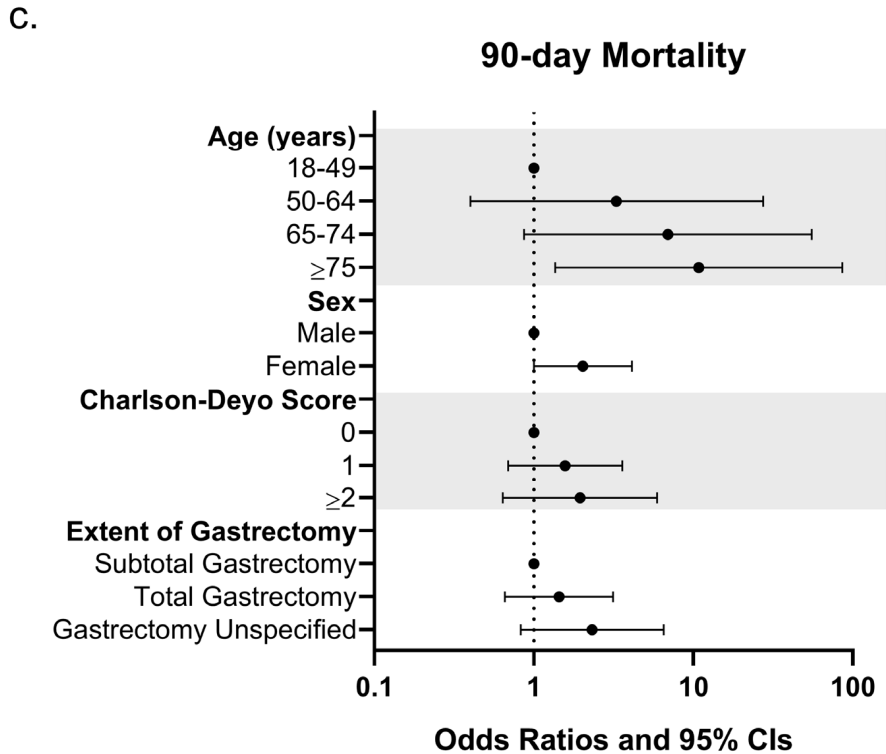

Supplement: NIHMS1808467-supplement-supple_3.pdf [file NIHMS1808467-supplement-supple_3.pdf]
